# Supplementary material
Source: publisher site journal article supplement (https://www.dovepress.com/article/330434)
Supplement: Supplementary file 1 [file get_supplementary_file.php]

**Supplementary Figure 1:** Risk score analysis of the seven-gene prognostic model in The Cancer Genome Atlas (TCGA) internal training cohort. (A) Survival curve for low-risk and high-risk groups. (B) Receiver operating characteristic (ROC) curves for predicting overall survival (OS) based on the risk score. (C) Expression heat map, risk score distribution, and survival status.
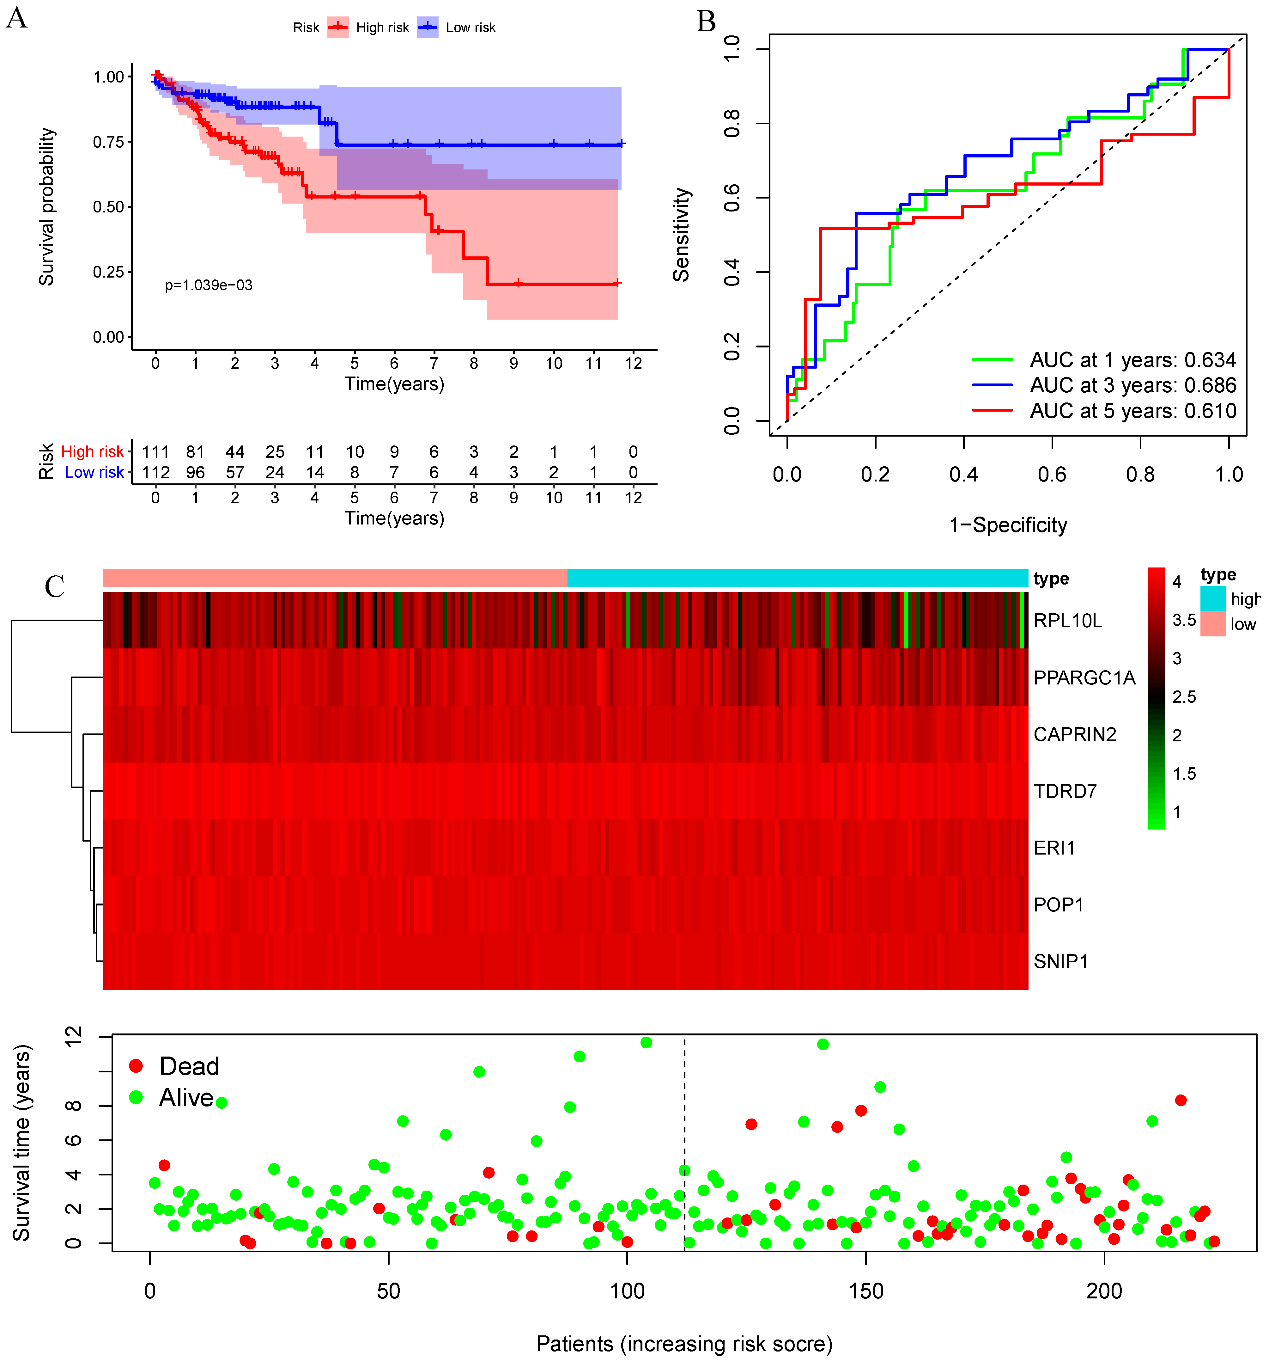


**Supplementary Figure 2:** Risk score analysis of the seven-gene prognostic model in The Cancer Genome Atlas (TCGA) internal testing cohort. (A) Survival curve for low-risk and high-risk groups. (B) Receiver operating characteristic (ROC) curves for predicting overall survival (OS) based on the risk score. (C) Expression heat map, risk score distribution, and survival status.


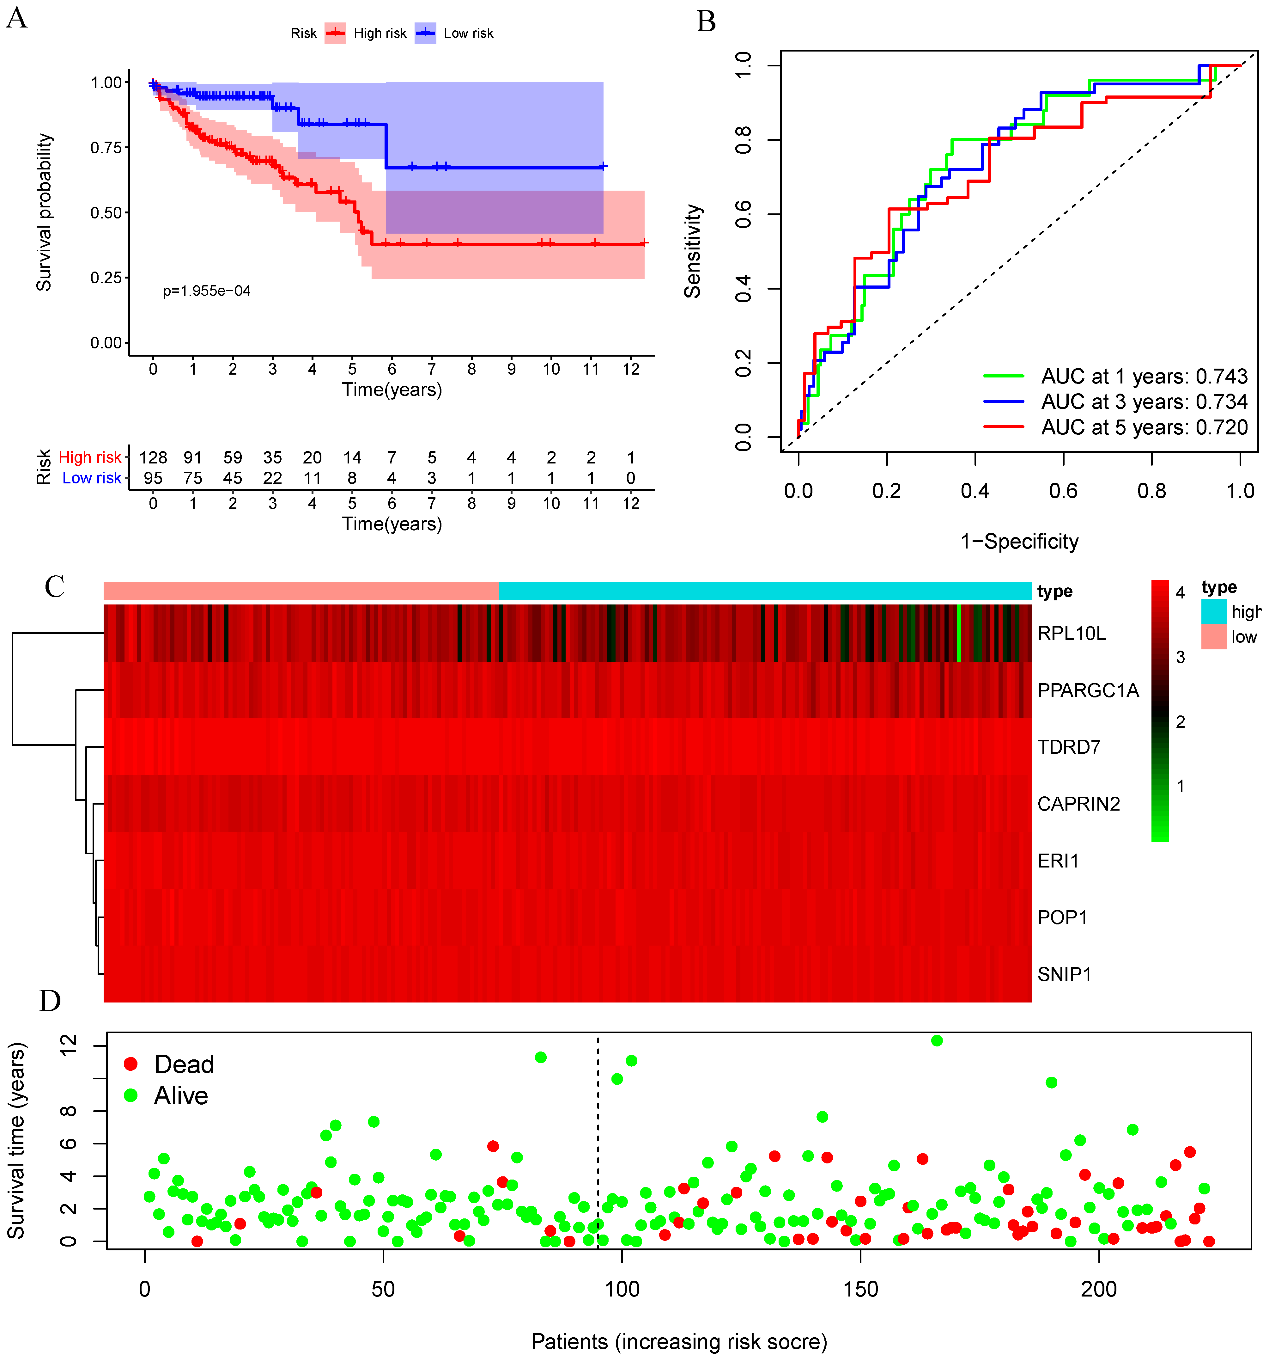


**Supplementary Table 1:** The prognostic value of different clinical parameters in The Cancer Genome Atlas (TCGA) internal training cohort.

|  | | **Univariate analysis** | | |  | **Multivariate analysis** | | | |
| --- | --- | --- | --- | --- | --- | --- | --- | --- | --- |
|  | **HR** | **95% CI** | **P-value** |  | **HR** | **95% CI** | **P-value** | | |
| **Age** | | 1.053 | 1.021-1.086 | <0.001 |  | 1.067 | 1.032-1.103 | | <0.001 | |
| **Gender** | | 1.159 | 0.644-2.086 | 0.623 |  | 0.908 | 0.501-1.643 | | 0.749 | |
| **Stage** | | 2.121 | 1.486-3.028 | <0.001 |  | 1.962 | 1.350-2.850 | | <0.001 | |
| **Risk score** | | 1.492 | 1.300-1.712 | <0.001 |  | 1.407 | 1.224-1.617 | | <0.001 | |

**Supplementary Table 2:** The prognostic value of different clinical parameters in The Cancer Genome Atlas (TCGA) internal testing cohort.

|  | | **Univariate analysis** | | |  | **Multivariate analysis** | | | |
| --- | --- | --- | --- | --- | --- | --- | --- | --- | --- |
|  | **HR** | **95% CI** | **P-value** |  | **HR** | **95% CI** | **P-value** | | |
| **Age** | | 1.013 | 0.988-1.039 | 0.301 |  | 1.031 | 1.003-1.059 | | 0.027 | |
| **Gender** | | 1.133 | 0.626-2.052 | 0.679 |  | 1.025 | 0.548-1.918 | | 0.939 | |
| **Stage** | | 2.054 | 1.485-2.841 | <0.001 |  | 2.100 | 1.492-2.957 | | <0.001 | |
| **Risk score** | | 1.095 | 1.050-1.143 | <0.001 |  | 1.082 | 1.029-1.137 | | 0.002 | |
